# Supplementary material for: Wildfire Effects on Rangeland Health in Three Thermo-Mediterranean Vegetation Types in a Small Islet of Eastern Aegean Sea
Source: MDPI journal article supplement (doi:10.3390/land12071413), 2023-07-14
Supplement: s1 [file s1]

Table S1. The recorded taxa in the unburned and burned sites

| SPECIES                        | UNBURNED |     |      | BURNED   |        |         |
|--------------------------------|----------|-----|------|----------|--------|---------|
|                                | Sarco*   | Lad | LadV | Sarcobur | Ladbur | LadVbur |
| <i>Aegilops cylindrica</i>     | X        | X   |      |          |        |         |
| <i>Aegilops neglecta</i>       | X        | X   |      | X        |        |         |
| <i>Aira elegantissima</i>      |          |     | X    |          | X      | X       |
| <i>Anagalis arvensis</i>       | X        |     |      | X        | X      | X       |
| <i>Anthemis rigida</i>         |          | X   |      |          |        |         |
| <i>Anthoxanthum odoratum</i>   |          | X   | X    |          | X      | X       |
| <i>Anthyllis hermanniae</i>    |          |     | X    |          |        |         |
| <i>Asparagus acutifolius</i>   | X        |     |      | X        |        | X       |
| <i>Asphodelus aestivus</i>     | X        |     | X    | X        | X      | X       |
| <i>Avena barbata</i>           | X        | X   | X    | X        | X      | X       |
| <i>Bituminaria bituminosa</i>  | X        |     |      | X        |        | X       |
| <i>Brachypodium distachyon</i> | X        | X   |      | X        |        |         |
| <i>Briza maxima</i>            | X        | X   | X    | X        | X      | X       |
| <i>Bromus intermedius</i>      | X        | X   |      | X        |        | X       |
| <i>Bromus madritensis</i>      |          |     |      | X        |        |         |
| <i>Bromus scoparius</i>        |          |     |      | X        |        |         |
| <i>Capsela bursa-pastoris</i>  |          |     |      | X        | X      |         |
| <i>Bromus tectorum</i>         | X        | X   | X    |          |        |         |
| <i>Cardus pycnocephalus</i>    | X        |     |      | X        |        | X       |
| <i>Centaureum erythraea</i>    | X        |     |      |          |        |         |
| <i>Cerastium glomeratum</i>    |          |     | X    | X        | X      |         |

|                                           |   |   |   |   |   |   |
|-------------------------------------------|---|---|---|---|---|---|
| <i>Chrysanthemum coronarium</i>           |   | X |   | X |   |   |
| <i>Cistus creticus</i>                    | X | X | X |   | X | X |
| <i>Cistus salviifolius</i>                | X | X | X |   |   | X |
| <i>Crepis commutata</i>                   | X |   |   |   |   |   |
| <i>Crepis multiflora</i>                  | X |   | X |   |   |   |
| <i>Cynodon dactylon</i>                   | X |   | X | X | X | X |
| <i>Cynosurus echinatus</i>                | X | X |   | X | X | X |
| <i>Dactylis glomerata</i>                 |   | X | X |   |   | X |
| <i>Dasypyrum villosum</i>                 |   |   |   |   |   |   |
| <i>Daucus involucratus</i>                |   |   |   |   | X |   |
| <i>Dittrichia viscosa</i>                 |   | X | X | X | X | X |
| <i>Echium plantagineum</i>                |   |   | X |   |   |   |
| <i>Erica manipuliflora</i>                |   | X |   |   |   |   |
| <i>Erodium moscatum</i>                   | X |   | X |   |   | X |
| <i>Filago eriocephala</i>                 | X |   |   | X | X |   |
| <i>Filago gallica</i>                     |   | X | X | X | X |   |
| <i>Gastridium ventricosum</i>             | X |   | X | X | X | X |
| <i>Geranium lucidum</i>                   |   |   |   |   |   |   |
| <i>Hordeum bulbosum</i>                   | X |   |   |   |   |   |
| <i>Hordeum murinum</i>                    | X | X | X | X |   | X |
| <i>Hyparrhenia hirta</i>                  | X |   |   | X |   |   |
| <i>Hypochoeris sp.</i>                    |   | X |   | X |   |   |
| <i>Kickxia elatine</i>                    |   |   |   |   |   |   |
| <i>Lagoecia cuminoides</i>                | X | X | X | X | X | X |
| <i>Lagurus ovatus</i>                     | X | X | X | X | X |   |
| <i>Lavandula stoechas</i>                 | X | X | X | X |   |   |
| <i>Linum strictum subsp. corymbulosum</i> |   | X |   |   |   |   |

|                                     |   |   |   |   |   |   |
|-------------------------------------|---|---|---|---|---|---|
| <i>Linum trigynum</i>               |   |   | X |   |   |   |
| <i>Lolium rigidum</i>               | X |   |   |   |   |   |
| <i>Lophochloa cristata</i>          |   | X |   |   |   |   |
| <i>Lotus peregrinus</i>             |   |   |   |   | X | X |
| <i>Medicago sp.</i>                 |   |   | X |   |   |   |
| <i>Medicago cf praecox</i>          |   |   |   |   | X |   |
| <i>Micromeria juliana</i>           |   |   |   |   | X |   |
| <i>Onobrychis caput-galli</i>       | X |   |   |   |   |   |
| <i>Orchis sancta</i>                |   | X |   |   |   |   |
| <i>Ornithopus compressus</i>        |   |   |   | X | X | X |
| <i>Oxalis pes-carpae</i>            |   |   |   | X |   |   |
| <i>Pine regeneration</i>            |   |   |   |   |   | X |
| <i>Papaver rhoeas</i>               | X |   |   |   |   |   |
| <i>Parietaria cretica</i>           |   | X |   |   |   |   |
| <i>Petrorhagia dubia</i>            | X | X | X | X | X |   |
| <i>Picnomon acarna</i>              |   | X | X |   |   |   |
| <i>Piptatherum miliaceum</i>        | X |   |   |   |   |   |
| <i>Pistacia lentiscus</i>           | X | X | X | X | X | X |
| <i>Plantago lanceolata</i>          |   | X | X | X | X |   |
| <i>Plantago weldenii</i>            |   |   |   | X | X |   |
| <i>Poa bulbosa</i>                  |   | X |   |   |   |   |
| <i>Polycarpon tetraphyllum</i>      |   | X |   |   |   |   |
| <i>Pyracantha coccinea</i>          |   | X |   | X |   |   |
| <i>Rumex bucephalophorus</i>        |   | X | X |   |   |   |
| <i>Rumex pulcher subsp. pulcher</i> | X |   | X |   |   |   |
| <i>Sarcopoterium spinosum</i>       | X | X |   | X | X |   |

|                                |   |   |   |   |   |   |
|--------------------------------|---|---|---|---|---|---|
| <i>Spergularia bocconeii</i>   |   |   |   | X |   |   |
| <i>Senecio sp.</i>             |   |   | X | X | X |   |
| <i>Sheradia arvensis</i>       |   |   |   |   | X |   |
| <i>Silene gallica</i>          |   |   |   |   | X |   |
| <i>Taraxacum alepicum</i>      |   | X |   |   |   |   |
| <i>Taraxacum sp</i>            |   |   |   |   | X | X |
| <i>Torilis leptophylla</i>     |   |   |   | X |   |   |
| <i>Trifolium angustifolium</i> | X | X |   | X |   |   |
| <i>Trifolium arvensis</i>      | X |   | X |   | X | X |
| <i>Trifolium campestre</i>     | X | X | X | X | X | X |
| <i>Trifolium nigrescens</i>    | X |   |   |   |   |   |
| <i>Trifolium scabrum</i>       |   | X |   |   |   |   |
| <i>Trifolium stellatum</i>     | X |   | X | X | X |   |
| <i>Trigonella balansae</i>     | X |   |   |   |   |   |
| <i>Tuberaria guttata</i>       | X |   | X | X | X |   |
| <i>Verbascum sp</i>            | X |   |   |   | X | X |
| <i>Vicia villosa</i>           |   |   | X |   |   | X |
| <i>Vitex agnus-castus</i>      | X |   |   |   |   |   |
| <i>Vulpia myuros</i>           | X | X | X | X | X | X |

\*Sarco: low formations of *Sarcopoterium spinosum*

Lad: low formations of *Cistus creticus*

LadV: low formations of *Cistus creticus* in terraces
